# Supplementary material
Source: HighWire-hosted journal article supplement (https://www.cmajopen.ca/highwire/filestream/87019/field_highwire_adjunct_files/1/2020-0192-2-at.pdf)

FAX THIS PAGE TO COLON SCREENING PROGRAM: 1 (604) 297-9340

|                                   |                           |                              |
|-----------------------------------|---------------------------|------------------------------|
| EXAM DATE: COLONOSCOPY (YYYYMMDD) | PHN                       | DATE OF BIRTH (YYYYMMDD)     |
| FOLLOW UP DATE (YYYYMMDD)         | AMENDED DATE (YYYYMMDD)   | PATIENT NAME LAST            |
|                                   |                           | PATIENT NAME FIRST           |
|                                   |                           | SEX (F/M/X)                  |
| COLONOSCOPIST (MSC)               | COLONOSCOPIST LAST, FIRST | PRIMARY PROVIDER (MSC)       |
|                                   |                           | PRIMARY PROVIDER LAST, FIRST |

DATE OF ONSET SYMPTOMS (YYYYMMDD)      **Symptoms ongoing?**  No     Yes      DATE OF RESOLUTION (YYYYMMDD)

**The day prior to, or within 14 days after undergoing a colonoscopy, this patient had these unplanned event(s):**

|                                                                                                                |                                       |
|----------------------------------------------------------------------------------------------------------------|---------------------------------------|
| <input type="checkbox"/> Bowel prep complication                                                               | <input type="checkbox"/> Perforation  |
| <input type="checkbox"/> Rectal bleeding → Anticoagulation: <input type="radio"/> No <input type="radio"/> Yes | <input type="checkbox"/> Respiratory  |
| <input type="checkbox"/> Infection                                                                             | <input type="checkbox"/> Cardiac      |
| <input type="checkbox"/> Death: _____<br>(YYYYMMDD)                                                            | <input type="checkbox"/> Other: _____ |

Cause of death: \_\_\_\_\_

Comments: \_\_\_\_\_  
\_\_\_\_\_

**Patient first obtained medical attention:** \_\_\_\_\_  
(YYYYMMDD)

Family Physician       Emergency Room       Other: \_\_\_\_\_

**Patient required the following interventions: (check all that apply)**

|                                                       |                                                                                      |
|-------------------------------------------------------|--------------------------------------------------------------------------------------|
| <input type="checkbox"/> Blood transfusion            | <input type="checkbox"/> Additional Colonoscopy: _____<br>(YYYYMMDD)                 |
| <input type="checkbox"/> Antibiotics                  | <input type="checkbox"/> Other: _____                                                |
| <input type="checkbox"/> Surgery: _____<br>(YYYYMMDD) | <input type="checkbox"/> Hospital admission: _____ to _____<br>(YYYYMMDD) (YYYYMMDD) |

Comments: \_\_\_\_\_  
\_\_\_\_\_

\_\_\_\_\_  
Patient Coordinator Name

\_\_\_\_\_  
Patient Coordinator Signature

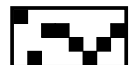

Supplement: 2020-0192-2-at.pdf [file 2020-0192-2-at.pdf]
